# Supplementary material for: Critical roles for CCR2 and MCP-3 in monocyte mobilization from bone marrow and recruitment to inflammatory sites
Source: JCI journal article supplement (doi:10.1172/jci29919), 2007-03-15
Supplement: sd1 [file 1]

## Blood

## Peritoneum

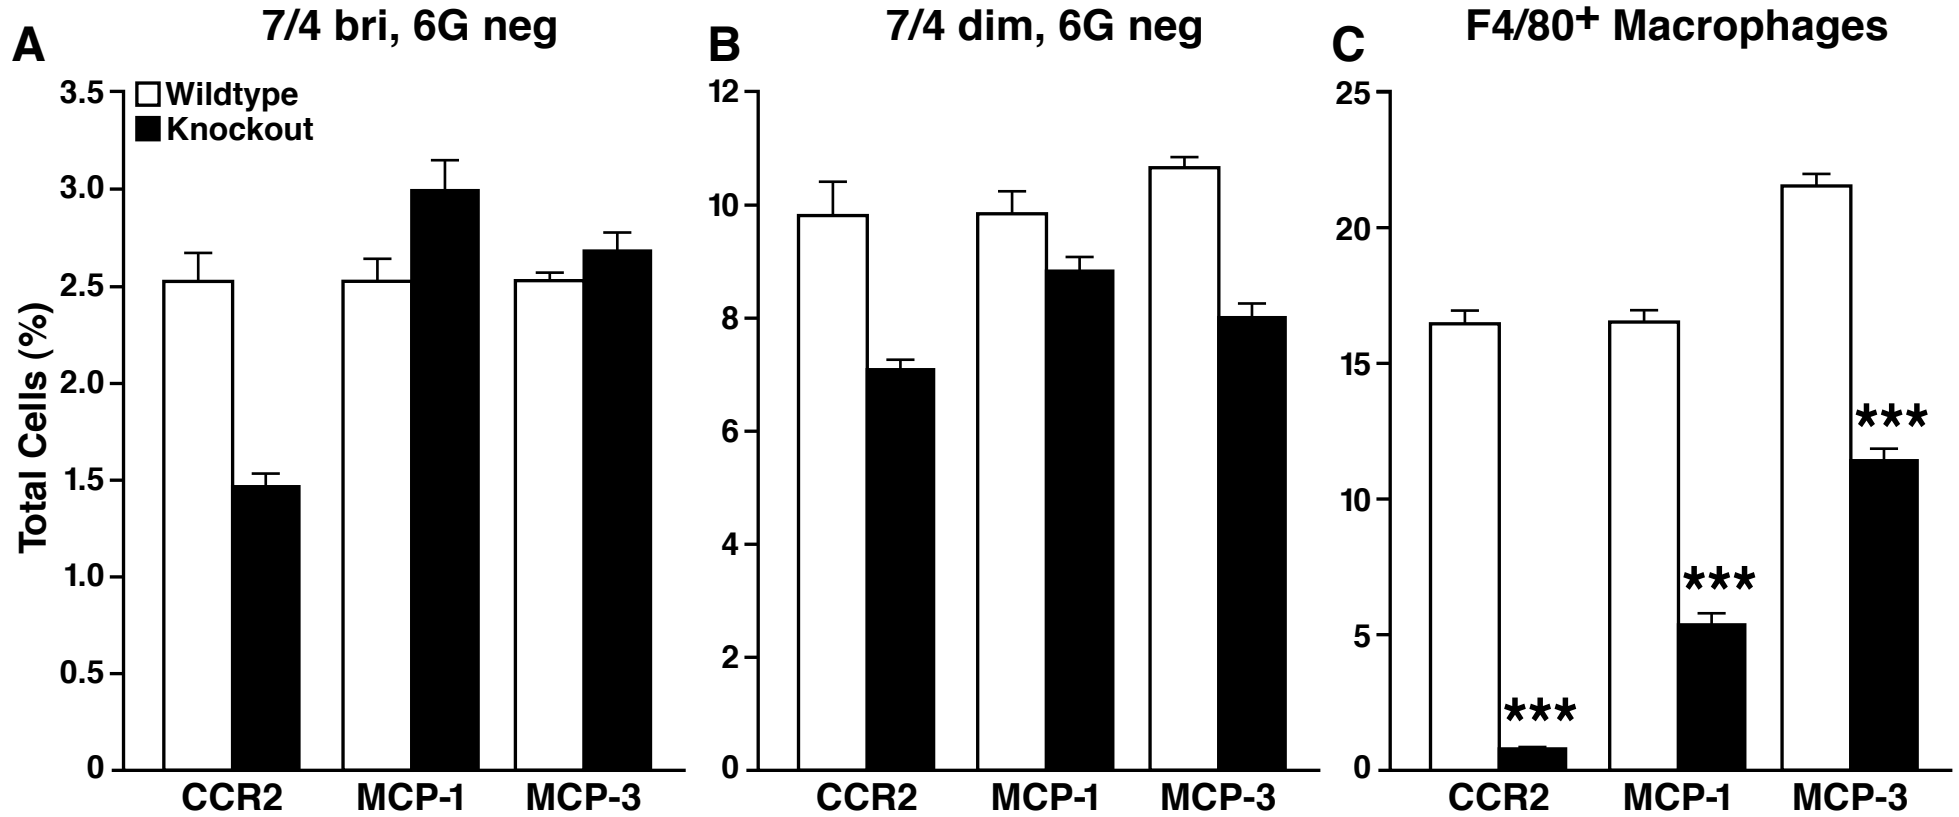

## Supplemental Figure 1

CCR2 is required for monocyte recruitment from the blood to the peritoneum. Wildtype, CCR2<sup>-/-</sup>, MCP-1<sup>-/-</sup>, and MCP-3<sup>-/-</sup> mice were given intraperitoneal thioglycollate to induce peritonitis. Twenty-four hours later, the monocyte/macrophage profiles of the blood and peritoneum were analyzed by FACS. Despite substantial numbers of both 7/4 bri (A) and 7/4 dim (B) monocytes in the blood, macrophage recruitment to the peritoneum (C) was profoundly reduced in all of the knockout mice.
